# Supplementary material for: An ongoing satellite–ring cycle of Mars and the origins of Phobos and Deimos
Source: Springer Nature journal article supplement (doi:10.1038/ngeo2916), 2017-03-20
Supplement: 41561_2017_BFngeo2916_MOESM167_ESM.pdf [file 41561_2017_BFngeo2916_MOESM167_ESM.pdf]

In the format provided by the authors and unedited.

# An ongoing satellite–ring cycle of Mars and the origins of Phobos and Deimos

Andrew J. Hesselbrock and David A. Minton

## 4 SI 1: Validating the Model

5 Here we use our RING-MOONS code to reproduce published results on the dynamics of  
6 the Saturnian system as a validation test. As described in the Methods, we use the work of  
7 Salmon et al. (2010) to describe the physics of how the ring viscously spreads. In order to test  
8 our solution of Equation 3, we replicated their results for the spreading of a variably viscous ring  
9 orbiting Saturn. We chose initial conditions that were nearly identical to those of Salmon et al.  
10 (2010). The initial surface mass density of the ring is a steeply peaked Gaussian function,  
11 centered at a semi-major axis of 110,000 km. The mass of the ring is equal to a Mimas mass,  
12 and the particles in the ring have a radius of 1 m and a density of 1000 kg/m<sup>3</sup>. In Figure SI2 we  
13 display these results at various points in time for 10<sup>5</sup> years of evolution, achieving good  
14 agreement with the results of Salmon et al. (2010).

15 In addition to validating our description of the spreading of the ring, we also compare our  
16 RING-MOONS code to HYDRORINGS, a code used in Charnoz et al. (2011) to model the  
17 accretion of satellites out of Saturn's rings. The viscous spreading of Saturn's rings and the  
18 accretion of small satellites is directly analogous to our model for the evolution of the martian  
19 ring/satellite system. In Fig. 3, Charnoz et al. (2011) display results for a viscously spreading  
20 ring accreting material into satellites over 4 Gy, assuming various tidal parameters between the  
21 satellites and Saturn. HYDRORINGS results for a system in which satellites undergo tidal  
22 interactions with the planet, but not other satellites are presented in Fig. 3 panel d. This scenario  
23 is very similar to our desired analysis of Mars. Because of the observational evidence for small

24 satellite accretion from the saturnian rings and the observed mass-distance relationship of the  
25 accreted satellites, the results of Charnoz et al. (2011) are an ideal test case to check the validity  
26 of our model against reality and other models established in the literature.

27         The HYDRORINGS code is not publically available, however the results displayed in  
28 Charnoz et al. (2011) are well described, and should be reproduced by our model. In Fig. 3,  
29 panel d of that work are displayed the results of satellites accreting out of a ring after  $\sim 4$  Gy,  
30 given no tidal dissipation between the satellites. In these results the mass of the initial ring is set  
31 at 4 Rhea masses ( $\sim 9.2 \times 10^{21}$  kg) and the density of particles within the ring is set at  $900 \text{ kg/m}^3$ .  
32 The tidal dissipation factors for Saturn are set to be  $k_2 = 0.341$  and  $Q = 1680$ . We use these same  
33 conditions to test whether the output of our model matches the results of HYDRORINGS, 4.1308  
34 Gy after the simulation has progressed, and the current satellite mass-distance relationship of  
35 Saturn's satellites.

36         The results of Charnoz et al. (2011) do not include a description of the initial profile of  
37 the surface mass density of the ring, the size of the ring particles, nor the radial extent of the ring.  
38 In comparing our model to this work, we model the surface mass density profile of the ring as  
39  $\Sigma(r) \propto r^{-3}$ , and the ring extends from the surface of Saturn to 90% of Saturn's FRL. For  
40 computational efficiency we set the particles in the ring to have a radius of 1 km. In Figure SI3  
41 we compare the results of our model, "RING-MOONS" against the results of HYDRORINGS<sup>31</sup>,  
42 and the current Saturn system. In the described scenario, after 4 Gy HYDRORINGS produces at  
43 least 16 satellites, while RING-MOONS produces 7. As displayed in Charnoz et al. (2011), the  
44 current Saturn system contains 10 satellites that may have accreted from Saturn's rings.  
45 Additionally, we find the general trend of Saturn satellites to have greater masses at greater semi-  
46 major axis which was reproduced by HYDRORINGS is also reproduced with our model. The

47 initial conditions selected here may differ than those selected in Charnoz et al. (2011), and may  
48 explain discrepancies between the results of the two models. However, dependent upon further  
49 work, both models may be able to reproduce the actual Saturn system.

50

## 51 **SI 2: The Dichotomy-Forming Impact**

52 The dichotomy-forming impact event sets two constraints: the upper limit to the mass of  
53 the initial ring created by the impact, and the starting time for the ring/satellite cycle. From a  
54 study of the formation of the martian hemispherical dichotomy from an impact using a large  
55 suite of smoothed particle hydrodynamics (SPH) simulations, the maximum mass of a ring  
56 created by the best case scenario is  $\sim 3 \times 10^{23} \text{ g}^{14}$ . Our preliminary results indicate that a satellite  
57 that is disrupted at the RRL will eventually accrete a new satellite with a mass  $\sim 20\%$  of the  
58 primordial satellite's mass (see Equation 15). Based upon this result, we calculate the mass of  
59 the ring that must have formed Phobos and call this "Cycle 1." Assuming this ring formed as a  
60 result of the tidal breakup of a primordial satellite that also evolved to the RRL, we calculate the  
61 mass in the previous cycle and call this "Cycle 2". Assuming tidal breakup of satellites occurs at  
62 the RRL, we find that if the dichotomy-forming impact produced a satellite with a mass of  $\sim 2.6$   
63  $\times 10^{22} \text{ g}$ , this system would eventually evolve over 5 cycles to produce a single satellite with the  
64 mass of Phobos.

65 As the impact event that formed the dichotomy likely occurred 4.3-4.5 Gy ago, the entire  
66 process, from the initial impact debris ring which cycles to produce a Phobos sized satellite that  
67 evolves into the orbit we observe today, *must* take at least  $\sim 4.3$  Gy. There are several factors  
68 that affect the timescale of an individual cycle including: the mass of the ring, the tidal  
69 parameters chosen for Mars and the satellites, and the size of the particles within the ring. The

70 mass of the ring is determined via Equation 15, and we find it unlikely that the tidal parameters  
71 of the satellites are much different than previously found<sup>7,16</sup>.

72         Because the ring particle size is unconstrained, we use this as a free parameter in the  
73 model and choose a value that allows the complete evolution to occur over the time since the  
74 dichotomy-forming impact 4.3 Gy ago. Between our results for different size ring particles we  
75 compare four timescales: the time for the ring to evolve from the RRL to the FRL, the time for  
76 satellites to accrete from the ring and evolve outwards due to ring torques, the time for the ring to  
77 deplete such that Lindblad torques no longer dominate the orbital evolution of the satellites, and  
78 the time for satellites to evolve inwards to the RRL due to planetary tides.

79         The time for the ring to evolve from the RRL to the FRL scales directly with particle  
80 radius, and is confirmed by our results for all cycles and all particle sizes. The time for the  
81 particles to accrete and evolve outwards has some dependency on particle size. This is  
82 confirmed by our results for rings composed of particles with a radius of 1 km and 100 m for all  
83 cycles, and for our results for rings composed of particles with a radius of 10 m for cycles 6, 5,  
84 and 4. The time for the ring to deplete has a strong dependence on particle size being largely set  
85 by the spreading timescale of the ring, similar to the evolution of ring material from the RRL to  
86 the FRL. The time for the satellites to evolve to the RRL after the ring has depleted is largely  
87 independent from the radius of the ring particles, as it is mainly driven by the orbital evolution of  
88 the satellite due to planetary tides.

89         To determine the necessary ring particle size needed to fit the giant impact age constraint  
90 we compare the timescales in our results for rings composed of different sized particles. For the  
91 early cycles, the time required for the ring to spread to the FRL is short compared to the time  
92 required to eventually evolve accreted satellites to the RRL. Thus, the mass of the ring, and not

93 the particle size, is the primary factor determining the time it takes for the early cycles to  
94 complete. However, in the later cycles the mass of the ring is never sufficient for Lindblad  
95 torques to greatly perturb the satellites' orbits<sup>7</sup>, and the satellites orbit near the edge of the ring.  
96 In these later cycles the time it takes for the ring to spread to the FRL, where it may begin to  
97 accrete into satellites, is much longer than the satellites' orbital evolution. Therefore, the time it  
98 takes for later cycles to complete is driven by the dynamics of the ring and shows a much greater  
99 dependency on particle size.

100 Because the evolution of the ring scales with the size of the ring particles, for cycles 3, 2,  
101 and 1 we assume that the ratio between these timescales for rings composed of particles which  
102 differ by an order of magnitude in radius remains constant. We are then able to extrapolate the  
103 amount of time a ring composed of any size particle will take to complete a given cycle. With  
104 this methodology, we estimate that modeling the ring particles as 0.18 m bodies would take the  
105 system roughly  $\sim 4.3$  Gy to form Phobos and place it in its current orbit. This result is in  
106 agreement with Saturn's rings today, which are estimated to be composed of particles with a  
107 radius between few centimeters to several meters<sup>22</sup>.

108

### 109 **SI 3: Uncertainty in the Location of Tidal Breakup:**

110 The greatest uncertainty in our estimation of the total number of cycles is the location  
111 where tidal breakup of each satellite occurs. Severe tidal deformation of a satellite may occur  
112 when the satellite is only a few Mars radii away, yet Phobos orbits Mars at  $\sim 2.76 R_M$  as a  
113 coherent body and is not believed to be losing material due to tidal torques. Therefore, we know  
114 tidal breakup should only occur when the satellite's semi-major axis is less than that of Phobos,  
115 which is currently orbiting inside the FRL. The Rigid Roche Limit (RRL) is defined as the

116 orbital location where a particle on the equator of a spherical satellite is no longer bound to the  
117 surface of the satellite. Assuming the satellite is a gravitational aggregate with no cohesion  
118 forces between particles, this occurs when the outward centrifugal forces of the satellite's  
119 rotation and tidal shear are stronger than the attractive gravitational forces of the satellite<sup>15</sup>.  
120 Therefore, for our nominal case we select the RRL as the location where satellite breakup occurs.

121         However, real satellites may have some internal cohesive strength, and it has been found  
122 that for a satellites with a plausible range of internal strength tidal breakup should occur  
123 somewhere within  $1.2 - 1.7 R_M$ <sup>16</sup>. This range sets the greatest uncertainty in our measurements.  
124 In Figure SI4 we ran simulations for a ring composed of particles with a 1 km radius and with a  
125 total ring mass of  $\sim 1.2 \times 10^{23}$  g until the cycle mechanism resulted in a satellite with a mass less  
126 than or equal to Phobos. However, in these simulations we varied the location where tidal  
127 breakup of the satellite occurred. We then compared the mass of the ring at the beginning of a  
128 cycle to the final satellite mass produced by the cycle.

129         These results show that if tidal breakup of the satellites occurs at  $1.2 R_M$ , each cycle will  
130 produce a satellite with  $\sim 6\%$  the mass of the ring at the beginning of the cycle. Beginning with  
131 a Phobos mass satellite and working backwards, we find that if the initial ring formed by the  
132 dichotomy-forming impact produced either a ring or a satellite with a mass of  $\sim 5 \times 10^{22}$  g,  
133 Phobos would form after only 3 cycles. Furthermore, to place Phobos in orbit in  $\sim 4.3$  Gy after  
134 the dichotomy forming impact, we find that our model would require the radius of ring particles  
135 to be 0.15 m. On the other hand, if satellite breakup were to occur at  $1.7 R_M$ , we find that if the  
136 dichotomy forming impact produced either a ring or a satellite with a mass of  $\sim 1.7 \times 10^{23}$  g,  
137 Phobos would form after 7 cycles. In order to place Phobos in orbit in  $\sim 4.3$  Gy after the giant  
138 impact, we find that our model would require the radius of the ring particles to be 0.32 m.

139           The uncertainty in the location of tidal breakup therefore constrains the uncertainty in our  
140 results. In our “nominal case” we find a ring with an initial mass of  $1.2 \times 10^{23}$  g that is  
141 composed of particles with a radius of 0.18 m will evolve over 6 cycles to produce Phobos. As  
142 described above, if satellite breakup occurs at  $1.2 R_M$  the initial ring is less massive, fewer cycles  
143 occur, and the required particle radius is smaller. If satellite breakup occurs at  $1.7 R_M$ , the initial  
144 ring is more massive, more cycles occur, and the required particle radius is larger. Therefore, we  
145 find that an initial ring with a mass of  $1.2_{-0.7}^{+0.5} \times 10^{23}$  g that is composed of particles with a radius  
146 of  $0.18_{-0.03}^{+0.14}$  m would complete  $6_{-3}^{+1}$  cycles to place Phobos in its current orbit after  $\sim 4.3$  Gy.

147

#### 148 **SI 4: Existence of a Ring Today**

149           At the completion of Cycle 1, our simulation results in a Phobos-mass satellite orbiting  
150 Mars at its current semi-major axis. However, our simulations also result in the existence of a  
151 low-mass ring orbiting Mars. As there is no evidence that a ring exists today, this remains as a  
152 caveat to our work. The surface mass density of our remnant ring is on the order of  $\sim 1$  g/cm<sup>2</sup>  
153 (see Figure SI5). We estimate that the radius of the ring particles would be  $0.18_{-0.03}^{+0.14}$  m and  
154 therefore this ring would have an optical depth  $\tau \ll 1$  (see Methods). Although we have  
155 modeled our ring to have particles of identical size, a more realistic ring may have a distribution  
156 of particle sizes. For an optically thin ring, the effects of solar radiation may work to deplete the  
157 material, with the smallest particles experiencing Poynting-Robertson drag and the larger  
158 particles affected by the Yarkovsky Effect. Both these processes may work to remove material  
159 from the low mass remnant ring, explaining why we do not see it in the present day. Modeling of  
160 the effects of solar radiation on the remnant ring is beyond the scope of the present work.

161

162 **SI 5: Astro-Sediments in the Geologic Record:**

163           As the mass of the ring decreases, so does the rate of its evolution. Thus, initially the ring  
164 deposits material onto Mars at a very rapid rate which then decreases over time. Using our  
165 estimates of the timescales for a ring composed of 0.18 m particles (our “best case” scenario), we  
166 estimate the amount of time it would take for the ring to deposit 80% of the total cycle’s deposit,  
167 as well as at what time the deposit would have occurred in Mars geologic history.

168           We do not hypothesize how these “astro-sediment” deposits would appear in the geologic  
169 record. In addition to not knowing the interior and bulk composition of Phobos, there are a  
170 multitude of factors affecting the composition of the astrosediments including their interaction as  
171 they enter the atmosphere, the Martian geologic period at which the deposit occurs, and any  
172 weathering that would occur on the planet after the deposit, among others.

173

174

175



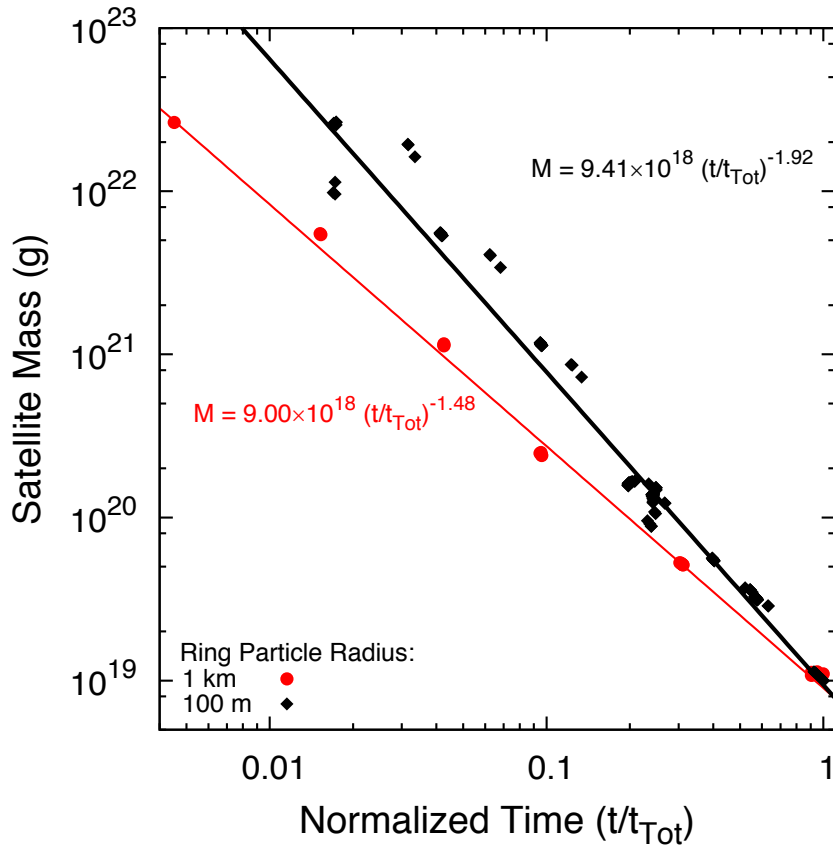

176

177 **Figure S11: Massive Early Cycles May Produce Multiple Massive Satellites**

178 Results for the mass evolution for Martian satellites over time, assuming all particles in the ring  
 179 have a radius of 1 km (red circles), or a radius of 100 m (black diamonds). The y-axis represents  
 180 the mass of the satellites. The x-axis displays the time each satellite crossed the Rigid Roche  
 181 Limit, save for the final Phobos analogs (bottom right). Time is represented as a fraction of the  
 182 total time ( $t_{Tot}$ ) from our initial conditions to placing a Phobos analog in the current orbit of  
 183 Phobos. In rings with 1 km radius particles, each cycle produces one massive satellite. In rings  
 184 with 100 m radius particles, early cycles may create several satellites which reach the RRL at  
 185 different times.

186

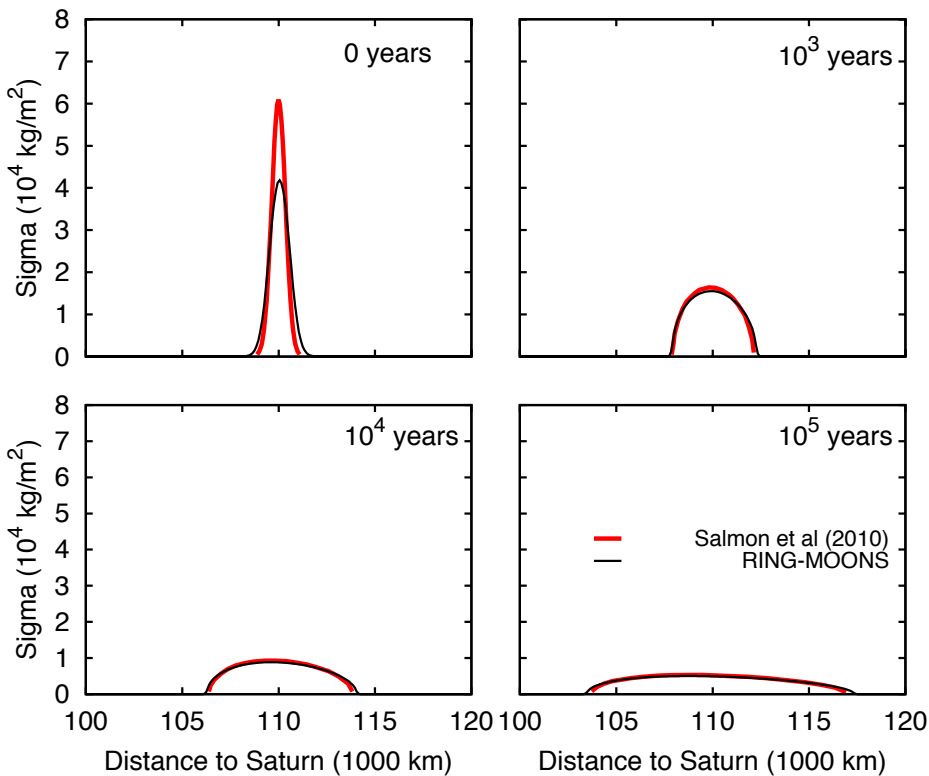

187

188 **Figure SI2: Modeling Saturn’s Rings Using RING-MOONS.**

189 Here we compare the results from our model, “RING-MOONS (black line) for a sharply peaked

190 ring viscously spreading in the Saturn system to others in the literature. To solve the viscous

191 spreading of the rings, we follow the viscous spreading model described in Salmon et al. (2010).

192 Despite our implementation of a different integration scheme, our results convincingly match the

193 results displayed in Figure 3 of Salmon et al. (2010) (red line).

194

195

196

## Saturn Satellite System (Time = 4.1308 By)

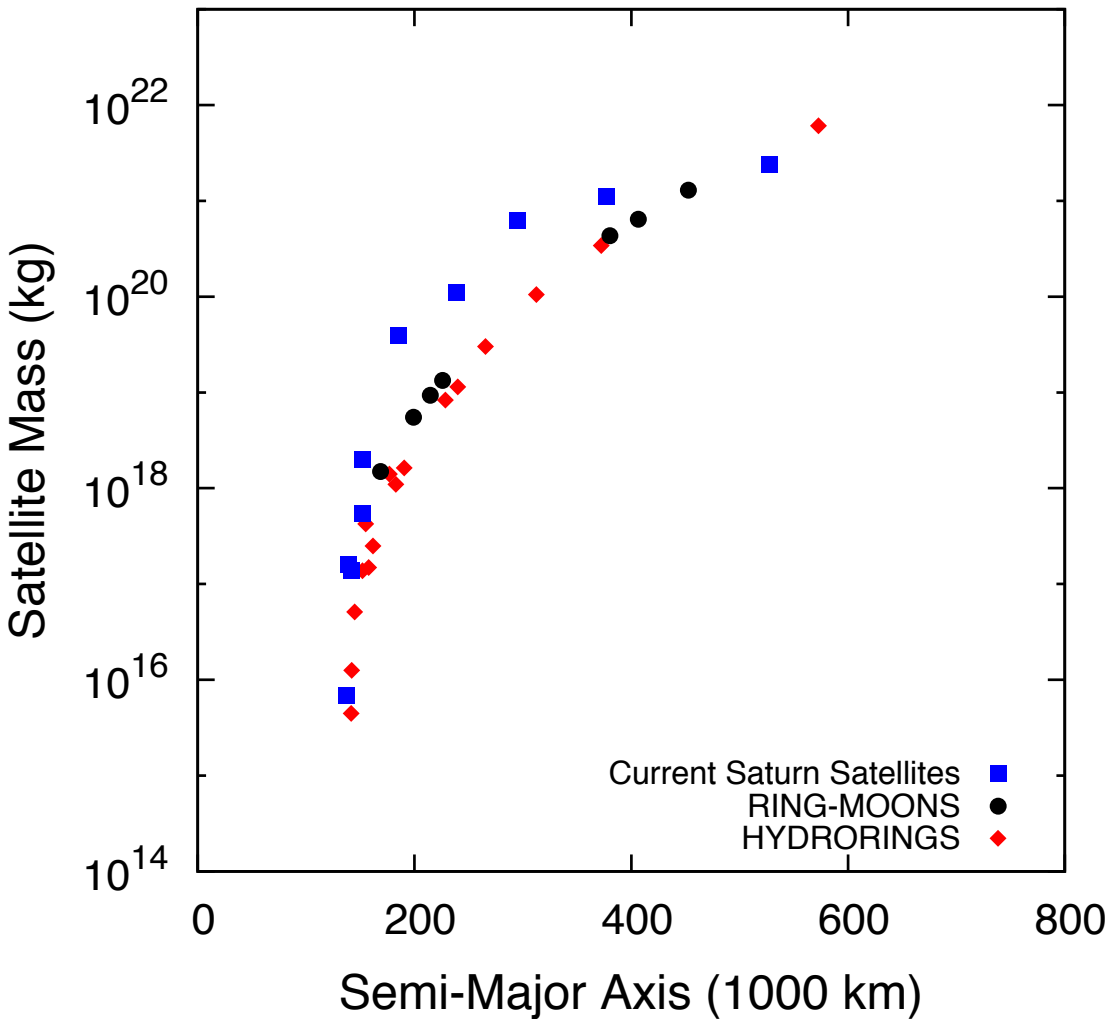

197

198 **Figure SI3: Modeling Saturn Satellite Accretion Using RING-MOONS.**

199 Here we display the results of our model, “RING-MOONS” (black dots) for the accretion of  
200 satellites from Saturn’s rings, and their orbital evolution over  $\sim 4$  Gy, assuming no tidal

201 dissipation in the satellites and the tidal quality factor of Saturn  $Q = 1680$ . We perform this  
202 simulation to benchmark our model against the actual Saturn system (blue squares) and other

203 models in the literature (red diamonds). Our model is similar in many ways to the

204 HYDRORINGS model described in Charnoz et al. (2011), and presents similar results.

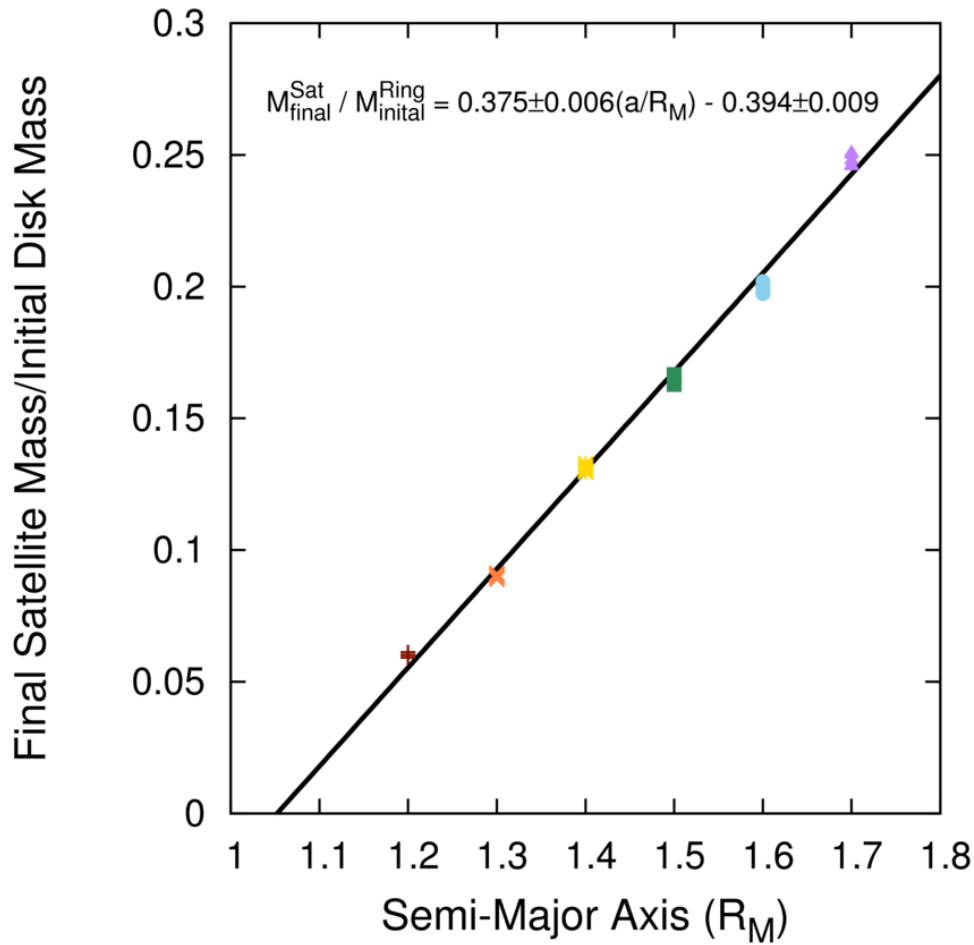

205

206 **Figure SI4: Location of Tidal Breakup Affects Cycle Mass**

207 Here we display the ratio of the final satellite mass to the initial ring mass for each cycle while  
 208 varying the location of total satellite breakup. Satellite breakup may occur anywhere within 1.12  
 209 – 1.7  $R_M$ . We find that if a satellite disrupts at a location closer to Mars, the resulting ring will  
 210 produce a final satellite with a mass smaller than if the breakup was to occur farther away from  
 211 the planet.

212

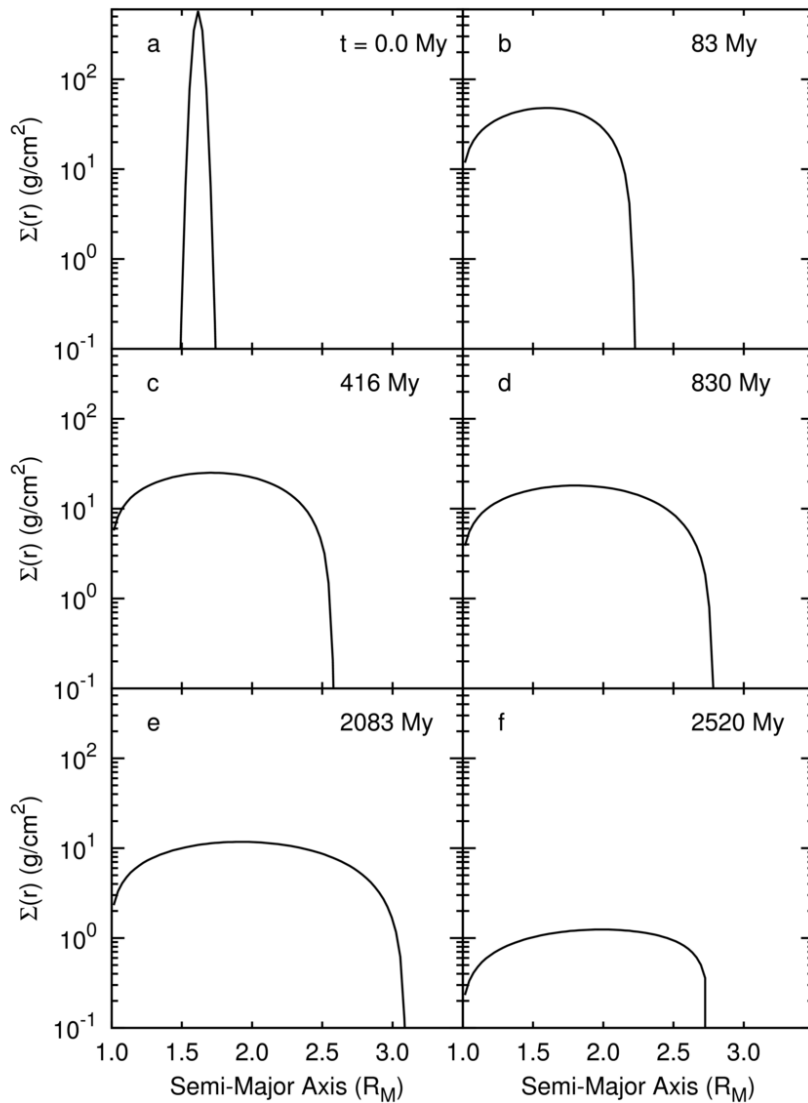

213

214 **Figure SI5: Surface-Mass Density of Ring During Cycle 1.**

215 Here we display the surface mass density ( $\Sigma$ ) of the ring during Cycle 1, the ring that produces  
 216 Phobos, for our “nominal case” at different times during the cycle. Although a ring still exists at  
 217 the completion of our simulation, there is likely not a ring visible today. Our results indicate the  
 218 ring at the completion of Cycle 1 is optically thin, with  $\tau \lesssim 0.03$ . We hypothesize that this low  
 219 mass remnant ring may be depleted due to solar radiation effects, which we do not model  
 220 currently.

| <b>Cycle<br/>#</b> | <b>Maximum<br/>Satellite<br/>Orbit (<math>R_M</math>)</b> |
|--------------------|-----------------------------------------------------------|
| 6                  | 4.9                                                       |
| 5                  | 3.9                                                       |
| 4                  | 3.5                                                       |
| 3                  | 3.3                                                       |
| 2                  | 3.1                                                       |
| 1                  | 3.1                                                       |

222

223 **Table SI1. Maximum Semi-Major Axis of Satellites**

224 Here we report the maximum semi-major axis for our “nominal” case (where satellite breakup  
 225 occurs at the RRL) that Lindblad torques could possibly evolve any accreted satellites for each  
 226 cycle. In cycles 6 and 5 the mass of the ring is massive enough for Lindblad torques to  
 227 overcome tidal torques and drive the satellites far away from the ring. However, by cycle 4 the  
 228 mass of the ring has been depleted enough that satellites are not driven far from the ring. In the  
 229 most recent cycles the Lindblad torques are not sufficient to drive the satellite away from the  
 230 ring, with their maximum semi-major axis existing near the ring edge.

231
